# Determinants of COVID-19 incidence and mortality: A cross-country analysis

Gursimer Jeet<sup>1</sup>, Atul Sharma<sup>1\*</sup>, Aarti Goyal<sup>1</sup>, Shankar Prinja<sup>1</sup>, Arvind Pandey<sup>2</sup>, Sandip Mandal<sup>3</sup>, Mendu Vishnuvardhana Rao<sup>4</sup>, Sumit Aggarwal<sup>5</sup>, Narendra K Arora<sup>6</sup>

1 Department of Community Medicine & School of Public Health, Post Graduate Institute of Medical Education and Research, Chandigarh, India

2 National Chair- Medical Statistics, Indian Council of Medical Research, New Delhi, India

3 Translational Global Health Policy Research Cell, Indian Council of Medical Research, New Delhi, India

4 National Institute of Medical Statistics, New Delhi, India

5 Division of Epidemiology and Communicable Diseases, Indian Council of Medical Research, New Delhi, India

6 The INCLIN Trust International, New Delhi, India

\*Corresponding author

The authors have withdrawn this manuscript because the source data was last updated at the end of March, and hence the authors believe that the results derived and conclusions drawn in the manuscript may not hold true now. Therefore, the authors do not wish this work to be cited as reference for the project. If you have any questions, please contact the corresponding author.
